# Supplementary material for: Temporal variability of diazotroph community composition in the upwelling region off NW Iberia
Source: Springer Nature journal article supplement (doi:10.1038/s41598-019-39586-4), 2019-03-06
Supplement: MOESM1 [file 41598_2019_39586_moesm1_esm.pdf]

## Supplementary Information

### Temporal variability of diazotroph community composition in the upwelling region off NW Iberia

**Víctor Moreira-Coello<sup>1\*</sup>, Beatriz Mouriño-Carballido<sup>1</sup>, Emilio Marañón<sup>1</sup>, Ana Fernández-Carrera<sup>1</sup>, Antonio Bode<sup>2</sup>, Eva Sintés<sup>3</sup>, Jonathan P. Zehr<sup>4</sup>, Kendra Turk-Kubo<sup>4</sup> and Marta M. Varela<sup>2</sup>**

<sup>1</sup>Facultade de Ciencias do Mar, Universidade de Vigo, Spain

<sup>2</sup>Instituto Español de Oceanografía, A Coruña, Spain

<sup>3</sup>Instituto Español de Oceanografía, Baleares, Spain

<sup>4</sup>Ocean Sciences Department, University of California, Santa Cruz, California, USA

**\*Correspondence:**

Víctor Moreira-Coello

[vmoreira@uvigo.es](mailto:vmoreira@uvigo.es)

**Table S1.** Number of sequences obtained per sample after quality filtering and before subsampling to minimum sequencing depth to compute relative abundances.

|                    | <b>Sample</b> | <b>Number of sequences</b> |
|--------------------|---------------|----------------------------|
| <b>Downwelling</b> | Feb 2014      | 0 m 18540                  |
|                    | May 2015      | 40 m 15482                 |
|                    |               | 70 m 18115                 |
|                    | Nov 2015      | 0 m 18417                  |
|                    |               | 40 m 18103                 |
|                    |               | 70 m 18859                 |
|                    | Dec 2015      | 0 m 22106                  |
|                    |               | 40 m 20433                 |
|                    |               | 70 m 20193                 |
| <b>Upwelling</b>   | May 2014      | 0 m 28126                  |
|                    |               | 20 m 26237                 |
|                    |               | 40 m 9534                  |
|                    | Apr 2015      | 0 m 33925                  |
|                    |               | 40 m 39060                 |
|                    |               | 70 m 25152                 |
|                    | Jun 2015      | 0 m 17961                  |
|                    |               | 40 m 36019                 |
|                    |               | 70 m 27050                 |
| <b>Relaxation</b>  | Jul 2015      | 0 m 49612                  |
|                    |               | 40 m 29774                 |
|                    |               | 70 m 24011                 |
|                    | Sep 2015      | 0 m 17520                  |
|                    |               | 40 m 20334                 |
|                    |               | 70 m 27169                 |
|                    | <b>Total</b>  | <b>581732</b>              |

**Table S2.** Distance matrix between samples based on Bray-Curtis dissimilarity indices (%).

|    | Feb 2014 |       |       | May 2015 |       |       | Nov 2015 |       |       | Dec 2015 |       |       | Jul 2015 |       |       | Sep 2015 |       |       | May 2014 |       |       | Apr 2015 |       |      | Jun 2015 |      |      |
|----|----------|-------|-------|----------|-------|-------|----------|-------|-------|----------|-------|-------|----------|-------|-------|----------|-------|-------|----------|-------|-------|----------|-------|------|----------|------|------|
|    | 0 m      | 40 m  | 70 m  | 0 m      | 40 m  | 70 m  | 0 m      | 40 m  | 70 m  | 0 m      | 40 m  | 70 m  | 0 m      | 40 m  | 70 m  | 0 m      | 20 m  | 40 m  | 0 m      | 40 m  | 70 m  | 0 m      | 40 m  | 70 m | 0 m      | 40 m | 70 m |
|    | D1       | D2    | D3    | D4       | D5    | D6    | D7       | D8    | D9    | R1       | R2    | R3    | R4       | R5    | R6    | U1       | U2    | U3    | U4       | U5    | U6    | U7       | U8    | U9   |          |      |      |
| D1 | 0        |       |       |          |       |       |          |       |       |          |       |       |          |       |       |          |       |       |          |       |       |          |       |      |          |      |      |
| D2 | 0.901    | 0     |       |          |       |       |          |       |       |          |       |       |          |       |       |          |       |       |          |       |       |          |       |      |          |      |      |
| D3 | 0.877    | 0.902 | 0     |          |       |       |          |       |       |          |       |       |          |       |       |          |       |       |          |       |       |          |       |      |          |      |      |
| D4 | 0.895    | 0.633 | 0.951 | 0        |       |       |          |       |       |          |       |       |          |       |       |          |       |       |          |       |       |          |       |      |          |      |      |
| D5 | 0.803    | 0.887 | 0.925 | 0.875    | 0     |       |          |       |       |          |       |       |          |       |       |          |       |       |          |       |       |          |       |      |          |      |      |
| D6 | 0.832    | 0.810 | 0.763 | 0.749    | 0.726 | 0     |          |       |       |          |       |       |          |       |       |          |       |       |          |       |       |          |       |      |          |      |      |
| D7 | 0.873    | 0.771 | 0.756 | 0.848    | 0.887 | 0.767 | 0        |       |       |          |       |       |          |       |       |          |       |       |          |       |       |          |       |      |          |      |      |
| D8 | 0.765    | 0.859 | 0.797 | 0.835    | 0.784 | 0.779 | 0.636    | 0     |       |          |       |       |          |       |       |          |       |       |          |       |       |          |       |      |          |      |      |
| D9 | 0.771    | 0.799 | 0.794 | 0.833    | 0.849 | 0.722 | 0.582    | 0.542 | 0     |          |       |       |          |       |       |          |       |       |          |       |       |          |       |      |          |      |      |
| R1 | 0.997    | 0.991 | 0.999 | 0.944    | 0.988 | 0.962 | 0.993    | 0.993 | 0.997 | 0        |       |       |          |       |       |          |       |       |          |       |       |          |       |      |          |      |      |
| R2 | 0.902    | 0.916 | 0.965 | 0.877    | 0.833 | 0.770 | 0.856    | 0.875 | 0.880 | 0.581    | 0     |       |          |       |       |          |       |       |          |       |       |          |       |      |          |      |      |
| R3 | 0.956    | 0.880 | 0.703 | 0.870    | 0.921 | 0.719 | 0.833    | 0.883 | 0.856 | 0.920    | 0.819 | 0     |          |       |       |          |       |       |          |       |       |          |       |      |          |      |      |
| R4 | 0.892    | 0.862 | 0.766 | 0.859    | 0.828 | 0.703 | 0.755    | 0.780 | 0.749 | 0.916    | 0.780 | 0.702 | 0        |       |       |          |       |       |          |       |       |          |       |      |          |      |      |
| R5 | 0.965    | 0.880 | 0.792 | 0.830    | 0.929 | 0.803 | 0.867    | 0.902 | 0.836 | 0.864    | 0.772 | 0.663 | 0.748    | 0     |       |          |       |       |          |       |       |          |       |      |          |      |      |
| R6 | 0.920    | 0.923 | 0.771 | 0.890    | 0.886 | 0.832 | 0.852    | 0.835 | 0.867 | 0.731    | 0.611 | 0.682 | 0.792    | 0.673 | 0     |          |       |       |          |       |       |          |       |      |          |      |      |
| U1 | 0.998    | 0.996 | 0.998 | 0.999    | 0.999 | 0.998 | 0.995    | 0.997 | 0.997 | 0.907    | 0.972 | 0.997 | 0.998    | 0.998 | 0.997 | 0        |       |       |          |       |       |          |       |      |          |      |      |
| U2 | 0.984    | 0.987 | 0.994 | 0.990    | 0.978 | 0.993 | 0.991    | 0.976 | 0.985 | 0.904    | 0.935 | 0.994 | 0.997    | 0.996 | 0.994 | 0.498    | 0     |       |          |       |       |          |       |      |          |      |      |
| U3 | 0.998    | 0.998 | 0.995 | 0.999    | 1.000 | 0.999 | 0.994    | 0.991 | 0.991 | 0.878    | 0.959 | 0.997 | 0.998    | 0.999 | 0.995 | 0.545    | 0.506 | 0     |          |       |       |          |       |      |          |      |      |
| U4 | 0.962    | 0.933 | 0.962 | 0.929    | 0.992 | 0.963 | 0.935    | 0.966 | 0.955 | 0.312    | 0.493 | 0.887 | 0.867    | 0.858 | 0.689 | 0.997    | 0.999 | 0.999 | 0        |       |       |          |       |      |          |      |      |
| U5 | 0.933    | 0.925 | 0.806 | 0.934    | 0.958 | 0.918 | 0.912    | 0.943 | 0.933 | 1.000    | 0.981 | 0.824 | 0.939    | 0.884 | 0.833 | 0.999    | 0.990 | 0.987 | 0.982    | 0     |       |          |       |      |          |      |      |
| U6 | 0.985    | 0.942 | 0.854 | 0.926    | 0.952 | 0.915 | 0.949    | 0.948 | 0.940 | 0.977    | 0.953 | 0.868 | 0.941    | 0.868 | 0.903 | 0.999    | 0.998 | 0.999 | 0.989    | 0.935 | 0     |          |       |      |          |      |      |
| U7 | 0.882    | 0.889 | 0.851 | 0.866    | 0.796 | 0.739 | 0.878    | 0.855 | 0.894 | 0.909    | 0.752 | 0.736 | 0.571    | 0.807 | 0.767 | 0.998    | 0.992 | 0.996 | 0.842    | 0.973 | 0.965 | 0        |       |      |          |      |      |
| U8 | 0.984    | 0.971 | 0.931 | 0.948    | 0.984 | 0.935 | 0.981    | 0.947 | 0.948 | 0.964    | 0.930 | 0.849 | 0.891    | 0.894 | 0.922 | 0.997    | 0.990 | 0.996 | 0.959    | 0.988 | 0.830 | 0.867    | 0     |      |          |      |      |
| U9 | 0.964    | 0.948 | 0.755 | 0.972    | 0.948 | 0.889 | 0.879    | 0.924 | 0.896 | 0.999    | 0.957 | 0.805 | 0.893    | 0.823 | 0.793 | 1.000    | 0.998 | 1.000 | 0.999    | 0.796 | 0.765 | 0.937    | 0.902 | 0    |          |      |      |

**Table S3.** Distribution of oligotypes across samples from UCYN-A *nifH* library. Number of sequences are provided for the six most abundant oligotypes: oligo3 ATTCTATTTTCTT (100% nucleotide identity to KM012884), oligo1 ATCTCGCTTCTTT (100% identity to KM012889), oligo45 ATCTCGCTTTCTT (100% identity to LC013499), oligo46 ATTCTATTTCTTT (100% identity to KU183544), oligo103 ATTCTATTTTCTG (99% identity to KU218784) and oligo4 ACTCTATTTCCCT (100% identity to LC013598). Sequence counts for the rest of oligotypes (Other UCYN-A oligotypes) were summed for each UCYN-A sublineage detected, and the number of oligotypes represented (*n*) are indicated at each column. ‘UCYN-A other’ includes oligotypes that did not fall into the sublineages defined hitherto<sup>14</sup>, however, because they are low in frequency (<80 read counts each), we have not created new clusters for them.

| Sample      |          | UCYN-A1 |         | UCYN-A2 |         |          | UCYN-A4 | Other UCYN-A oligotypes |                    |                   |                        |     |   |
|-------------|----------|---------|---------|---------|---------|----------|---------|-------------------------|--------------------|-------------------|------------------------|-----|---|
|             |          | oligo1  | oligo45 | oligo3  | oligo46 | oligo103 | oligo4  | A1<br><i>n</i> =19      | A2<br><i>n</i> =16 | A4<br><i>n</i> =3 | A other<br><i>n</i> =3 |     |   |
| Downwelling | Feb 2014 | 0 m     | 0       | 0       | 32      | 0        | 1       | 0                       | 0                  | 2                 | 0                      | 0   |   |
|             | May 2015 | 40 m    | 0       | 0       | 183     | 0        | 7       | 0                       | 0                  | 2                 | 0                      | 0   |   |
|             | Nov 2015 | 0 m     | 1858    | 0       | 0       | 0        | 0       | 0                       | 0                  | 76                | 0                      | 0   | 0 |
|             |          | 40 m    | 363     | 0       | 0       | 0        | 0       | 0                       | 0                  | 17                | 0                      | 0   | 0 |
|             |          | 70 m    | 1024    | 0       | 1       | 0        | 0       | 0                       | 0                  | 40                | 0                      | 0   | 0 |
|             | Dec 2015 | 0 m     | 64      | 0       | 83      | 0        | 2       | 0                       | 0                  | 4                 | 9                      | 0   | 0 |
|             |          | 40 m    | 56      | 1       | 81      | 3        | 1       | 0                       | 0                  | 4                 | 4                      | 0   | 0 |
| 70 m        |          | 0       | 0       | 36      | 0       | 2        | 12      | 0                       | 0                  | 3                 | 1                      | 0   |   |
| Relaxation  | Jul 2015 | 0 m     | 10300   | 2126    | 16879   | 1755     | 401     | 628                     | 2203               | 1804              | 248                    | 151 |   |
|             |          | 40 m    | 493     | 73      | 10729   | 55       | 230     | 309                     | 76                 | 407               | 32                     | 2   |   |
|             |          | 70 m    | 151     | 4       | 1565    | 5        | 43      | 586                     | 24                 | 134               | 42                     | 3   |   |
|             | Sep 2015 | 0 m     | 229     | 17      | 1875    | 26       | 52      | 0                       | 17                 | 73                | 0                      | 3   |   |
|             |          | 40 m    | 1246    | 66      | 2241    | 92       | 37      | 0                       | 143                | 89                | 0                      | 5   |   |
|             |          | 70 m    | 677     | 112     | 6562    | 97       | 178     | 30                      | 115                | 212               | 7                      | 14  |   |
| Upwelling   | May 2014 | 0 m     | 0       | 0       | 7       | 0        | 0       | 0                       | 0                  | 0                 | 0                      | 0   |   |
|             |          | 20 m    | 0       | 0       | 4       | 0        | 1       | 0                       | 0                  | 0                 | 0                      | 0   |   |
|             | Apr 2015 | 0 m     | 0       | 0       | 20391   | 0        | 557     | 0                       | 1                  | 436               | 0                      | 0   |   |
|             |          | 40 m    | 0       | 0       | 2       | 0        | 0       | 0                       | 0                  | 0                 | 0                      | 0   |   |
|             |          | 70 m    | 691     | 0       | 0       | 0        | 0       | 0                       | 34                 | 0                 | 0                      | 0   |   |
|             | Jun 2015 | 0 m     | 0       | 0       | 2179    | 0        | 70      | 0                       | 0                  | 41                | 0                      | 0   |   |
| 40 m        |          | 0       | 0       | 1055    | 0       | 28       | 0       | 0                       | 21                 | 0                 | 0                      |     |   |
| Total       |          |         | 17152   | 2399    | 63905   | 2033     | 1610    | 1565                    | 2754               | 3237              | 330                    | 178 |   |

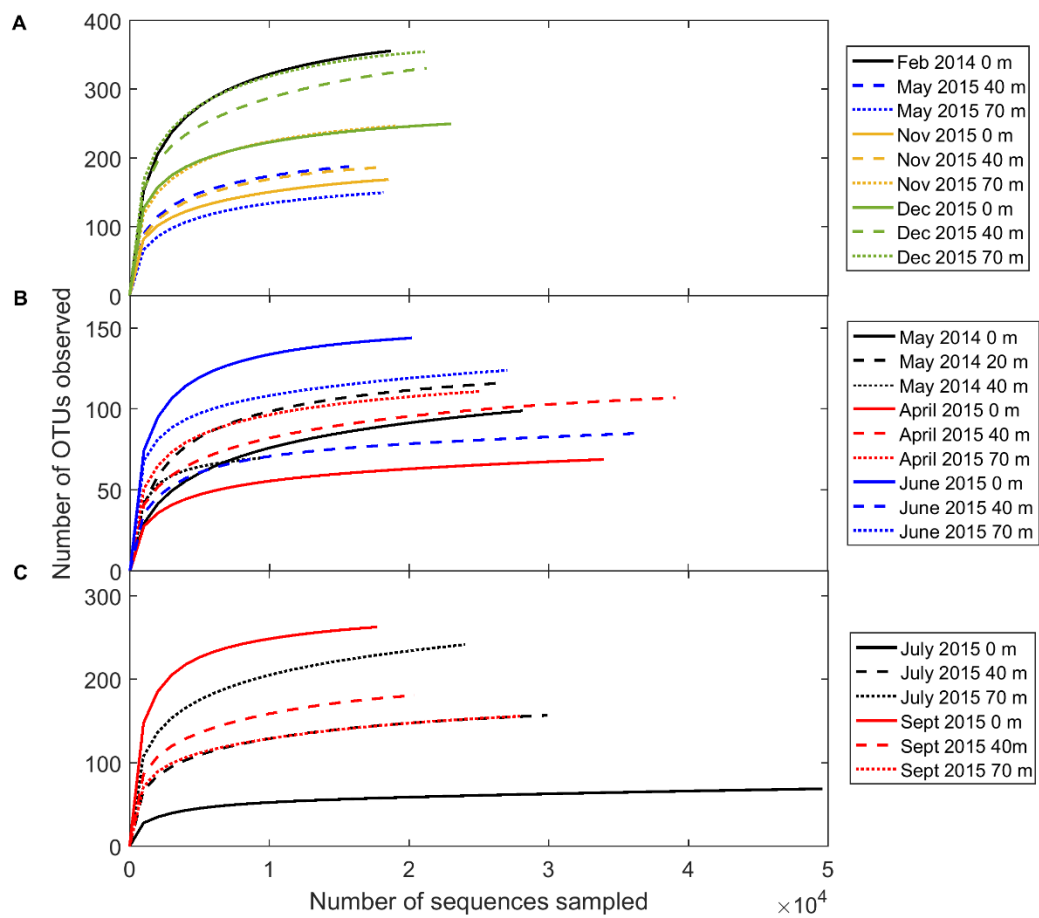

**Figure S1.** Rarefaction curves of all samples during **(A)** downwelling, **(B)** upwelling, and **(C)** relaxation conditions based on the number of observed OTUs clustered at 92% nucleotide identity cut-off.

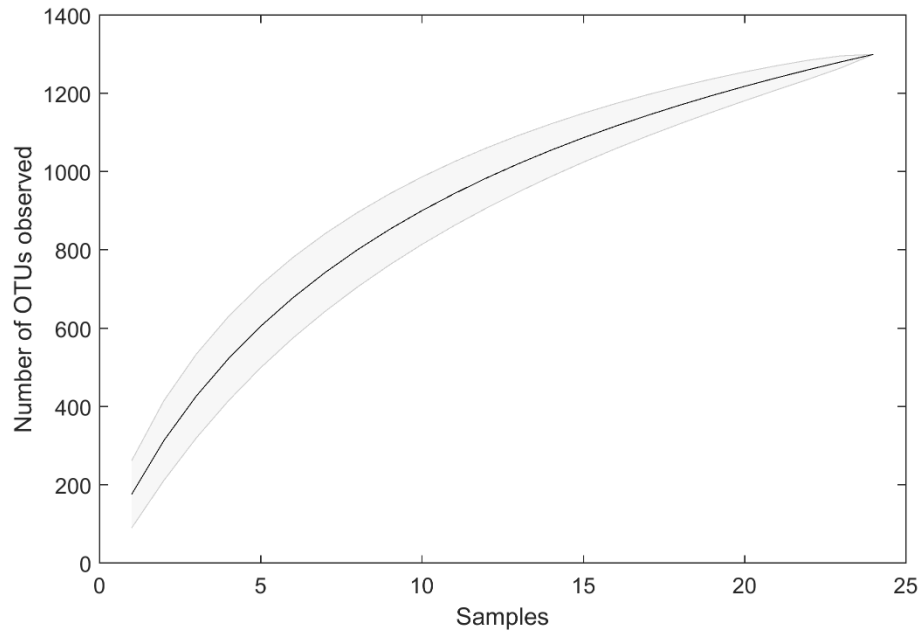

**Figure S2.** Species accumulation curve constructed using the Ugland's method<sup>70</sup>. Number of OTUs observed clustered at 92% nucleotide identity for the 24 *nifH* DNA samples collected in the region. Shaded area represents standard deviation.

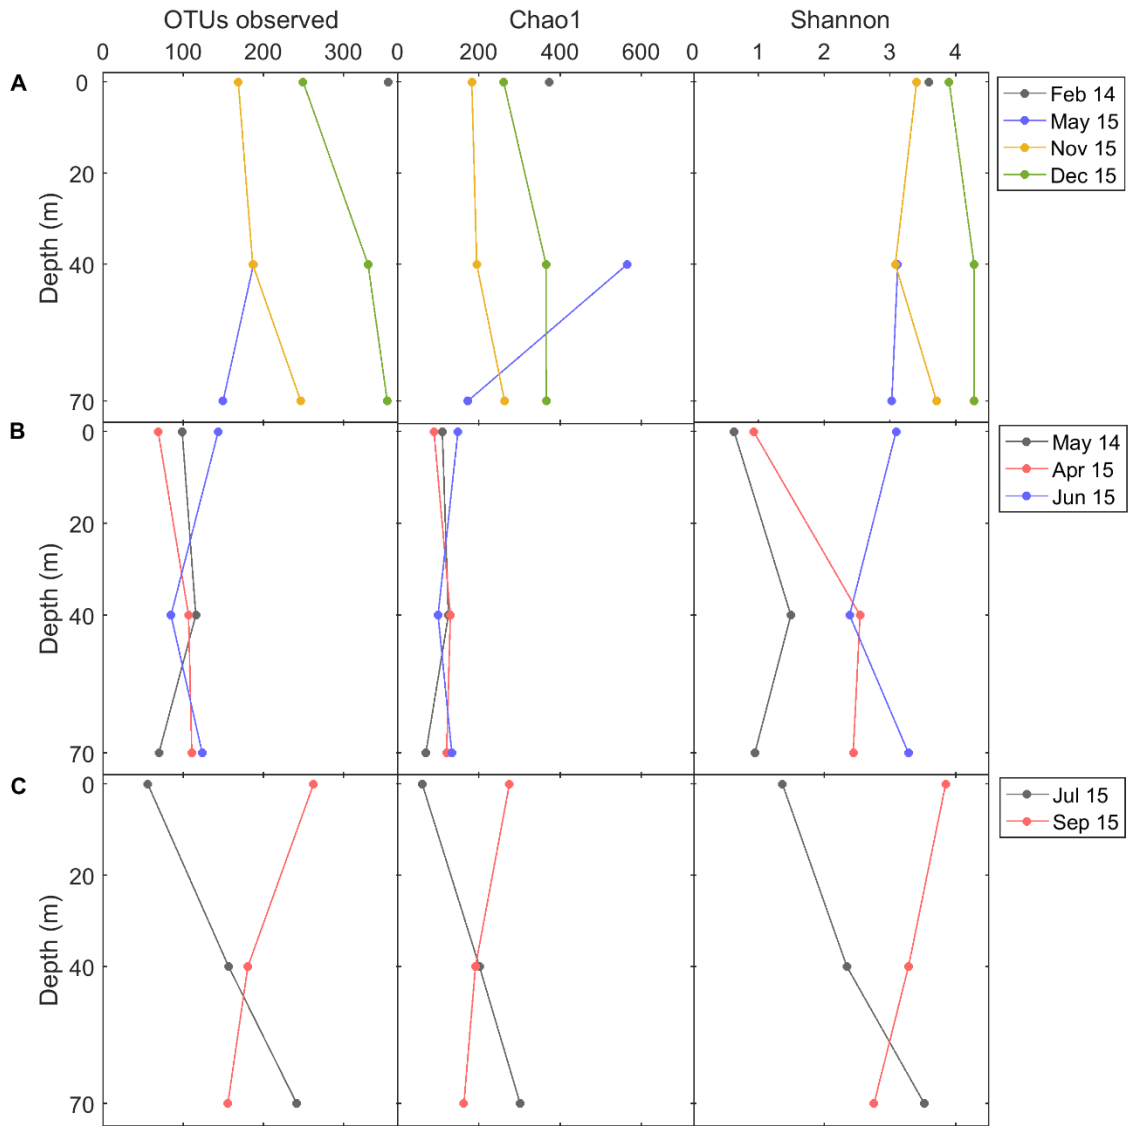

**Figure S3.** Number of OTUs observed, Chao1 richness estimator<sup>68</sup>, and Shannon diversity index<sup>69</sup> at 92% nucleotide identity for subsamples (9534 sequences each) during (A) downwelling, (B) upwelling, and (C) relaxation conditions.

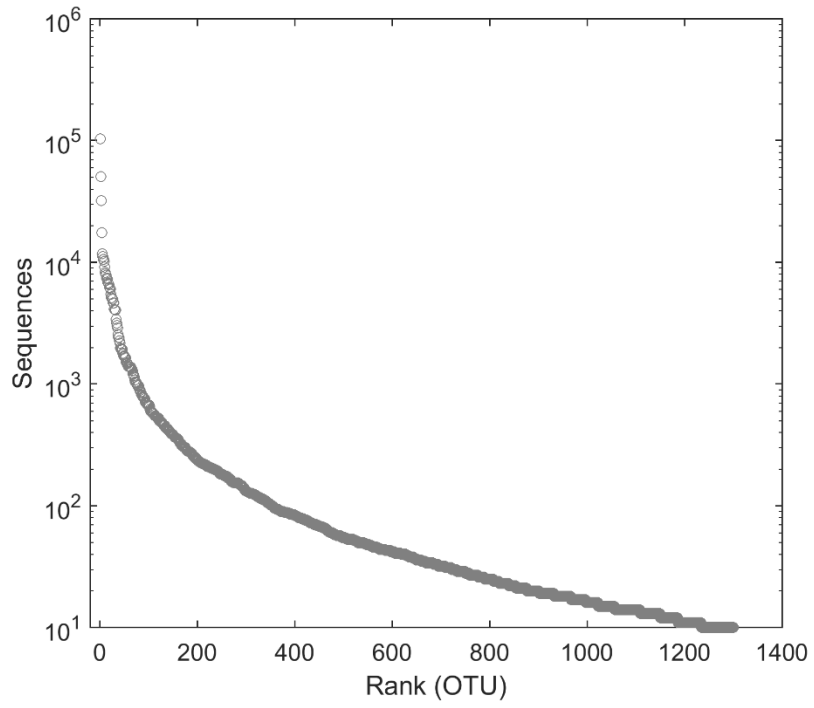

**Figure S4.** Evenness of the OTUs distribution in the *nifH* library. Number of sequences for each OTU at 92% of nucleotide identity.



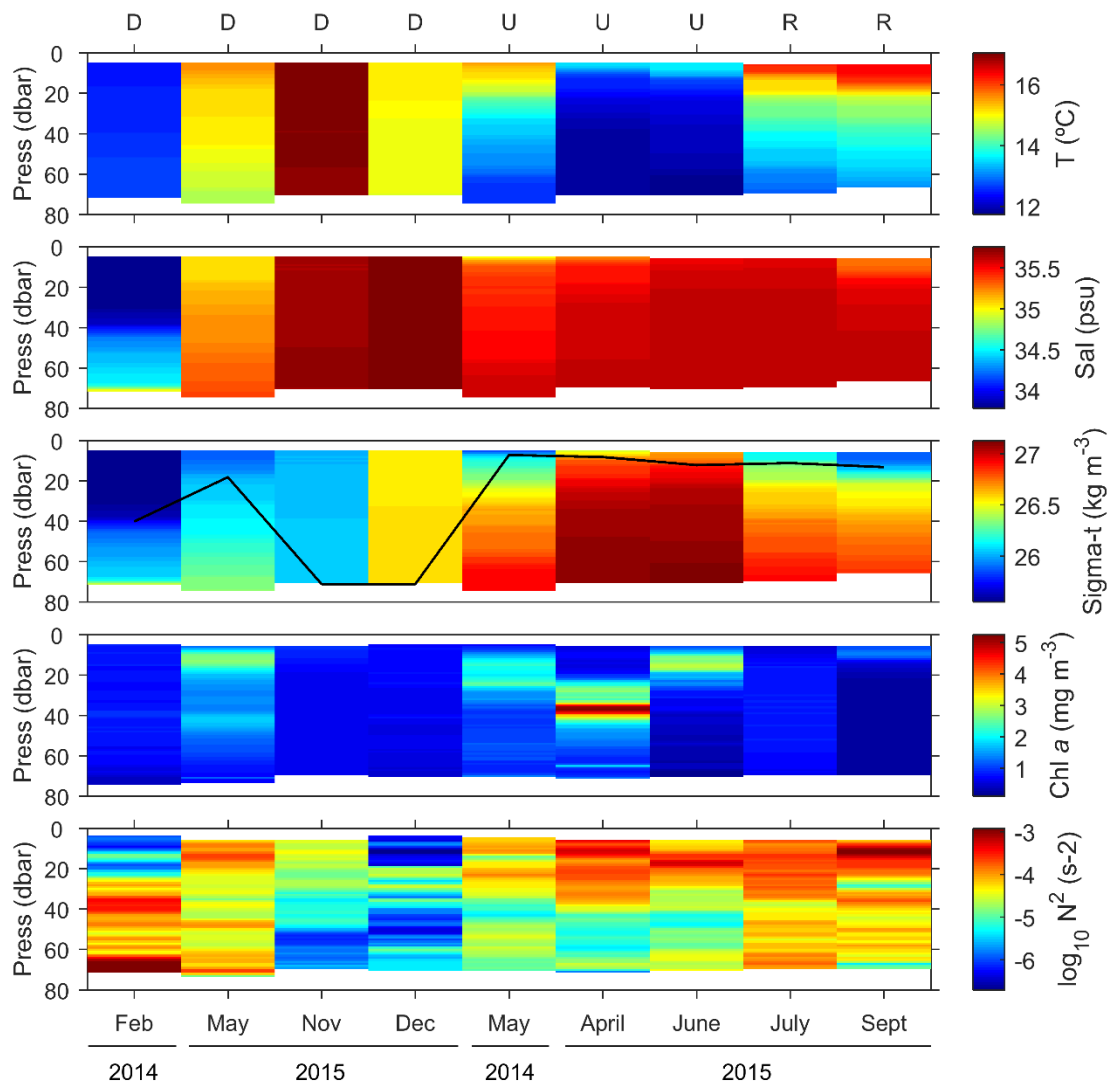

**Figure S5.** Vertical distribution of temperature (T), salinity (Sal), density (sigma-t), chlorophyll *a* concentration (Chl *a*) and squared Brunt Väisälä frequency ( $N^2$ ). The black line in the sigma-t panel indicates the mixed layer depth, estimated from an increase in water column density of  $0.125 \text{ kg m}^{-3}$  relative to surface values. Letters on top panel indicate the hydrographic condition sampled on each cruise (D, downwelling; U, upwelling; and R, relaxation). Chlorophyll *a* concentration was calculated from the calibrated fluorescence sensor (see section Materials and Methods in Moreira-Coello *et al.*<sup>48</sup>).

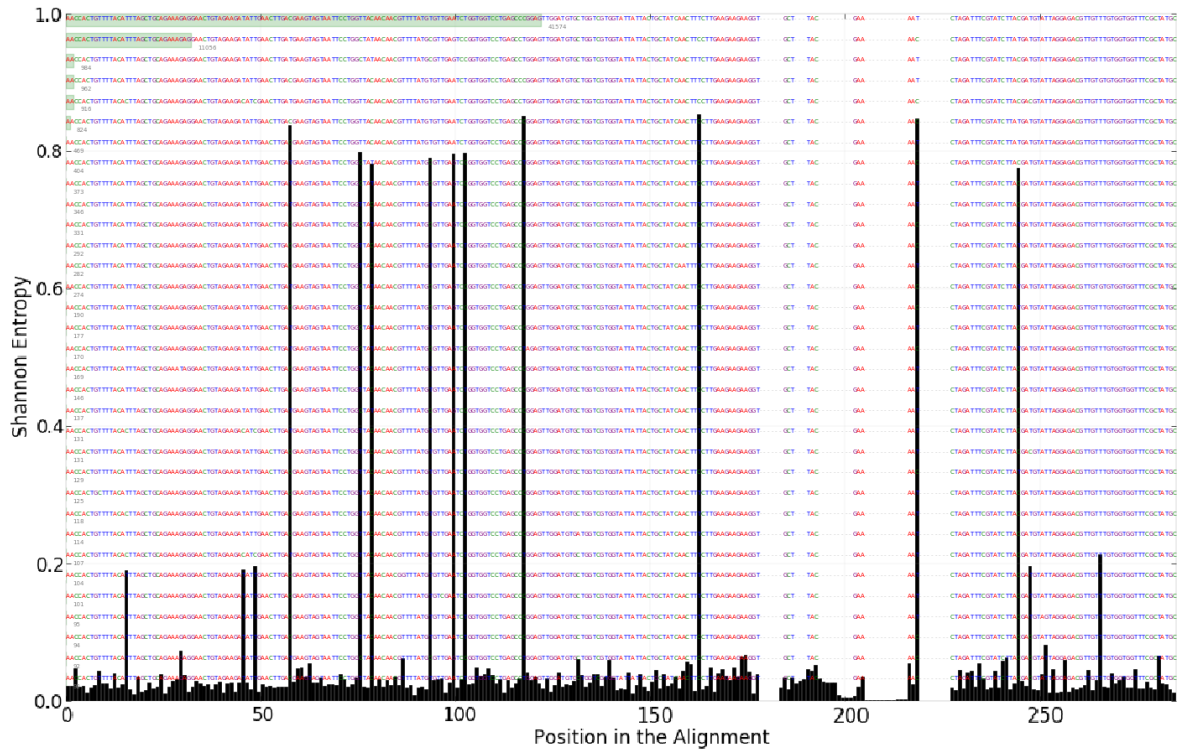

**Figure S6.** Shannon entropy analysis showing nucleotide positions with highest variability in the data set of UCYN-A *nifH* sequences. Output plot from the oligotyping pipeline ([merenlab.org/software/oligotyping/](http://merenlab.org/software/oligotyping/); Eren *et al.*<sup>15</sup>).
